# Supplementary material for: Synthesis, Characterization, and Antifogging Application of Polymer/Al2O3 Nanocomposite Hydrogels with High Strength and Self-Healing Capacity
Source: MDPI journal article supplement (doi:10.3390/polym10121362), 2018-12-08
Supplement: s1 [file s1]

Supplementary Information for

## **Synthesis, Characterization and Anti-fogging Application of Polymer/ $\text{Al}_2\text{O}_3$ Nanocomposite Hydrogels with High Strength and Self-healing Capacity**

*Bo Xu, Yuwei Liu, Jiugang Yuan, Ping Wang, and Qiang Wang \**

Key Laboratory of Eco-Textile, Ministry of Education, College of Textile and Clothing, Jiangnan University, Wuxi 214122, P. R. China.

\* Correspondence: qiang\_wang@163.com; Tel.: +86-510-8591-2005

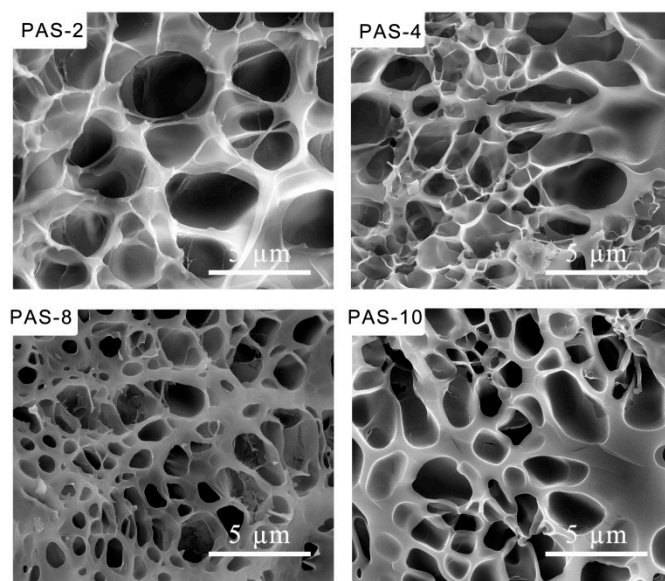

**Figure S1.** SEM images of PAS-2 gel, PAS-4 gel, PAS-8 gel and PAS-10 gel.

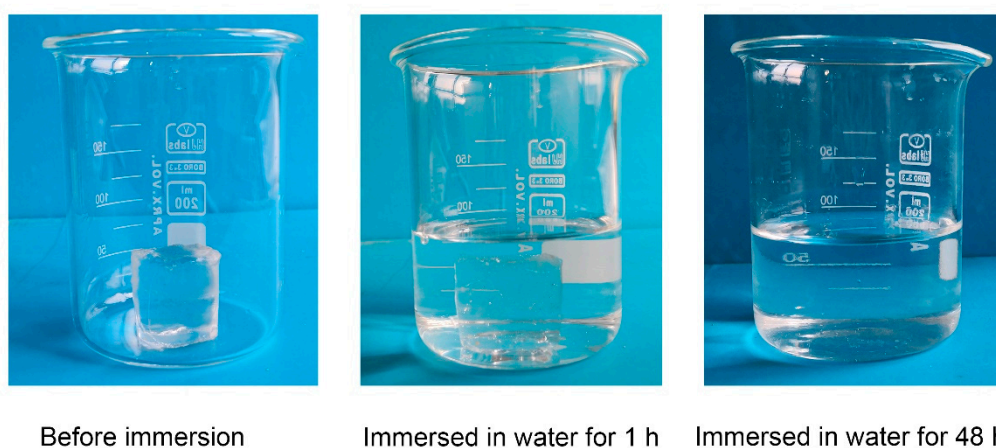

**Figure S2.** Illustration of the dissolution of neat poly (AA-co-AMPS) gels without  $\text{Al}_2\text{O}_3$  NPs

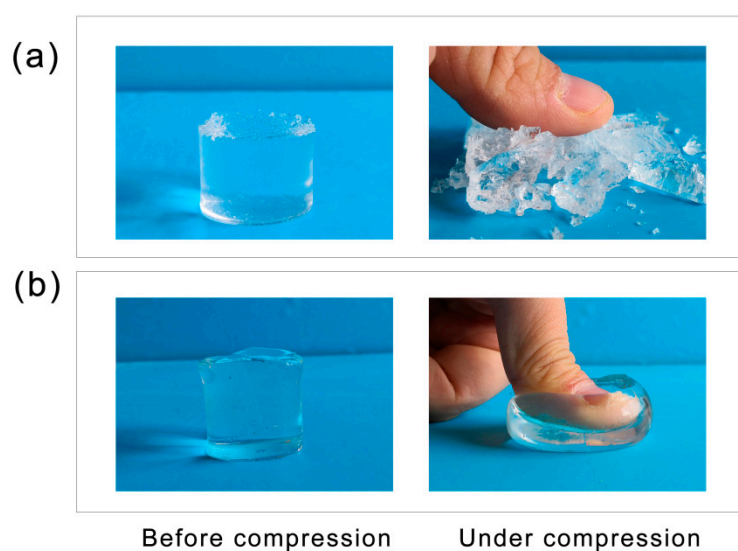

**Figure S3.** Illustration of mechanical properties of (a) BIS cross-linked hydrogel and (b) neat poly (AA-co-AMPS) hydrogel.

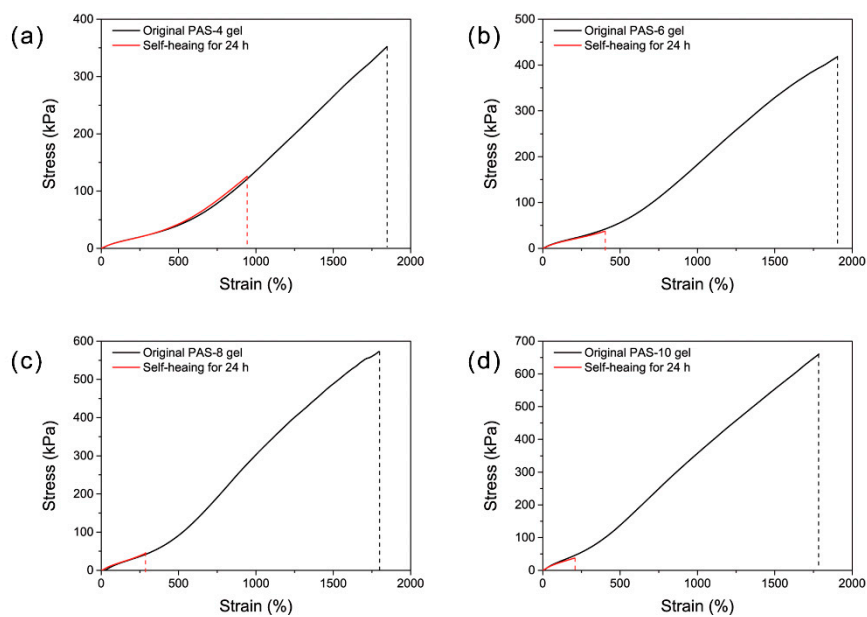

**Figure S4.** Stress-strain curves of original and healed PAS gels
